# Supplementary material for: Improving methanol assimilation in Yarrowia lipolytica via systematic metabolic engineering combined with compartmentalization
Source: Royal Society of Chemistry journal article supplement (doi:10.1039/d2gc02783f), 2022-10-11
Supplement: d2gc02783f1.pdf [file d2gc02783f1.pdf]

# Improving methanol assimilation in *Yarrowia lipolytica* via systematic metabolic engineering combined with compartmentalization

Shangjie Zhang, Feng Guo, Qiao yang, Yujia Jiang, Shihui Yang, Jiangfeng Ma, Fengxue Xin, Tomohisa Hasunuma, Akihiko Kondo,  
Wenming Zhang, Min Jiang

## Supplementary Information

**Supplemental Table1.** Strains and plasmids used in this study.

| Strains | Description                                                       | Reference                    |
|---------|-------------------------------------------------------------------|------------------------------|
| Po1f    | Base strain with leu <sup>-</sup> and ura <sup>-</sup> knockout   | Lab collection <sup>39</sup> |
| Y1-001  | po1f contained 113-das-dak and pki-aox-cta.                       | This study                   |
| Y1-002  | Y1-001 contained 113H- xyr-xdh-xyk.                               | This study                   |
| Y1-003  | Mutant of strain Y1-002 that grows using xylose as carbon source. | This study                   |

---

|             |                                                                    |                |
|-------------|--------------------------------------------------------------------|----------------|
| Y1-004      | Y1-003 contained 113H- fbp-fba-tal.                                | This study     |
| 004-Ptp     | Y1-004 contained 113H-Ptp.                                         | This study     |
| 004-Gnd     | Y1-004 contained 113H-Gnd.                                         | This study     |
| 004-Hsp70   | Y1-004 contained 113H-Hsp70.                                       | This study     |
| 004-Tpi     | Y1-004 contained 113H-Tpi.                                         | This study     |
| Y1-005      | 004-Hsp70 knocked out of sdh5                                      | This study     |
| Plasmids    |                                                                    |                |
| 113         | Amp <sup>R</sup> , Clone vector, Uracil, pTef and pGPD             | Lab collection |
| Pki         | Amp <sup>R</sup> , Clone vector, Leucine, pUAS1B8-TEF              | Lab collection |
| 113H        | 113 derivative using hygromycin to replace uracil as select maker. | This study     |
| 113-das-dak | 113 derivative harboring das and dak from <i>P. pastoris</i> .     | This study     |
| Pki-aox-cta | 113 derivative harboring aox and cta from <i>P. pastoris</i> .     | This study     |

---

|                   |                                                                            |            |
|-------------------|----------------------------------------------------------------------------|------------|
| 113H-xyr-xdh-xyk  | 113H derivative harboring xyr, xdh and xyk from <i>M. guilliermondii</i> . | This study |
| 113H- fbp-fba-tal | 113H derivative harboring fbp1p, fba2p and tal1p from <i>P. pastoris</i> . | This study |
| 113H-Ptp          | 113H derivative harboring Ptp from <i>Y. lipolytica</i> .                  | This study |
| 113H-Gnd          | 113H derivative harboring Gnd from <i>Y. lipolytica</i> .                  | This study |
| 113H-Hsp70        | 113H derivative harboring Hsp70 from <i>Y. lipolytica</i> .                | This study |
| 113H-Tpi          | 113H derivative harboring Tpi from <i>Y. lipolytica</i> .                  | This study |
| 113H-Shm1-Sda     | 113H derivative harboring Shm1 and Sda from <i>Y. lipolytica</i> .         | This study |
| pCRISPRyl-shd5    | pCRISPRyl derivative harboring sgRNA targeted to sdh5                      | This study |

---

**Supplemental Table 2.** Fermentation results of recombination strain from different carbon sources.

| Strains      | Methanol consumption<br>(g/L) | Cell growth<br>(Max OD <sub>600</sub> ) | Methanol consumption<br>rate (g/L·OD <sup>-1</sup> ) | Growth<br>Rate (OD/h) | Carbon sources                           |
|--------------|-------------------------------|-----------------------------------------|------------------------------------------------------|-----------------------|------------------------------------------|
| Y1-001       | 0.43                          | 0.96                                    | 0.448                                                | 0.013                 | 10 g/L Methanol+<br>+1 g/L Yeast extract |
| Y1-003       | 3.4                           | 8.7                                     | 0.391                                                | 0.120                 | 20 g/L Methanol+20 g/L Xylose            |
| Y1-004       | 4.5                           | 9.1                                     | 0.495                                                | 0.126                 | 20 g/L Methanol+20 g/L Xylose            |
| 004-Ptp      | 4.7                           | 8.3                                     | 0.566                                                | 0.115                 | 20 g/L Methanol+20 g/L Xylose            |
| 004-Gnd      | 5.8                           | 9.5                                     | 0.611                                                | 0.132                 | 20 g/L Methanol+20 g/L Xylose            |
| 004-Tpi      | 5.3                           | 9.3                                     | 0.570                                                | 0.129                 | 20 g/L Methanol+20 g/L Xylose            |
| 004-Hsp70    | 5.2                           | 10.5                                    | 0.495                                                | 0.146                 | 20 g/L Methanol+20 g/L Xylose            |
| 004-Shm1-Sda | 6.2                           | 9.6                                     | 0.646                                                | 0.133                 | 20 g/L Methanol+20 g/L Xylose            |

Y1-005                      2.8                      4.9                      0.571                      0.068                      20 g/L Methanol+20 g/L Xylose

---

**Supplemental Table3.** Transcriptome analysis result of relevant genes involved in the methanol metabolism.

| <b>id</b>         | <b>baseMean</b> | <b>baseMeanA</b> | <b>baseMeanB</b> | <b>foldChange</b> | <b>log2FoldChange</b> | <b>pval</b> | <b>padj</b> | <b>Description</b> |
|-------------------|-----------------|------------------|------------------|-------------------|-----------------------|-------------|-------------|--------------------|
| BKA90DRAFT_97120  | 727.86594       | 102.79248        | 1352.9394        | 13.161852         | 3.7182906             | 0.001615    | 0.1181513   | Tpi                |
| BKA90DRAFT_90876  | 14428.882       | 2691.9993        | 26165.766        | 9.7198261         | 3.2809305             | 0.001873    | 0.1247406   | Sda                |
| BKA90DRAFT_81944  | 8686.5657       | 3198.2038        | 14174.928        | 4.4321527         | 2.1480076             | 0.0338257   | 0.7249287   | AroF               |
| BKA90DRAFT_4102   | 4144.5337       | 1525.4016        | 6763.6658        | 4.4340229         | 2.1486162             | 0.0354603   | 0.7371152   | AroC               |
| BKA90DRAFT_29362  | 135.77212       | 25.617373        | 245.92686        | 9.600003          | 3.2630349             | 0.0398018   | 0.7884277   | Suc                |
| BKA90DRAFT_27005  | 1209.52         | 197.82704        | 2221.213         | 11.228056         | 3.4890362             | 0.0019226   | 0.1247406   | ilvC               |
| BKA90DRAFT_170863 | 1044.2295       | 1866.7503        | 221.70882        | 0.1187673         | -3.073791             | 0.0058098   | 0.2661822   | Gap                |
| BKA90DRAFT_162970 | 1459.72         | 535.2967         | 2384.1432        | 4.4538724         | 2.1550602             | 0.0410097   | 0.8076024   | Trp3               |
| BKA90DRAFT_157567 | 7838.7499       | 1185.9925        | 14491.507        | 12.218886         | 3.6110409             | 0.0007848   | 0.0773942   | Dak                |
| BKA90DRAFT_145330 | 39463.108       | 7680.344         | 71245.872        | 9.2763908         | 3.2135636             | 0.0021773   | 0.1357778   | Glt1               |
| BKA90DRAFT_143229 | 2714.9101       | 528.50852        | 4901.3117        | 9.2738557         | 3.2131693             | 0.0028137   | 0.1633648   | Got2               |

|                   |           |           |           |           |           |           |           |      |
|-------------------|-----------|-----------|-----------|-----------|-----------|-----------|-----------|------|
| BKA90DRAFT_142992 | 1720.1216 | 3040.1362 | 400.10708 | 0.1316083 | -2.925678 | 0.0066935 | 0.296582  | Gpma |
| BKA90DRAFT_142835 | 11512.621 | 1781.4131 | 21243.83  | 11.925269 | 3.5759499 | 0.0008347 | 0.0802583 | Cta  |
| BKA90DRAFT_141483 | 655.01925 | 91.155597 | 1218.8829 | 13.371454 | 3.7410845 | 0.0017008 | 0.1203585 | Xyr  |
| BKA90DRAFT_139160 | 1255.8013 | 201.706   | 2309.8965 | 11.451799 | 3.5175023 | 0.0017493 | 0.1214599 | Frm  |
| BKA90DRAFT_136082 | 491.40273 | 64.002866 | 918.8026  | 14.355648 | 3.8435465 | 0.0018819 | 0.1247406 | Mdh  |
| BKA90DRAFT_136038 | 17909.767 | 6578.7189 | 29240.815 | 4.4447583 | 2.152105  | 0.0327359 | 0.7137357 | TrpA |
| BKA90DRAFT_135217 | 2324.5005 | 401.47253 | 4247.5285 | 10.579873 | 3.4032505 | 0.0017859 | 0.1227358 | Shm1 |
| BKA90DRAFT_134641 | 5204.7515 | 967.80092 | 9441.7021 | 9.7558309 | 3.2862648 | 0.0020328 | 0.128404  | Acl  |
| BKA90DRAFT_133792 | 2615.1805 | 470.32409 | 4760.0368 | 10.120759 | 3.3392456 | 0.00204   | 0.128404  | ilvB |
| BKA90DRAFT_132755 | 575.73949 | 87.276636 | 1064.2023 | 12.193439 | 3.6080332 | 0.0026521 | 0.1580684 | ilvE |
| BKA90DRAFT_128453 | 4342.2316 | 769.97388 | 7914.4893 | 10.278906 | 3.3616149 | 0.0017079 | 0.1203585 | Xdh  |
| BKA90DRAFT_11213  | 10743.196 | 3966.2382 | 17520.153 | 4.4173224 | 2.1431721 | 0.0339054 | 0.7249287 | TrpD |

---

**Supplemental Table4.** Sequences of primer pairs used in this study. The green section is natural peroxisomal targeting signals and red section is the added peroxisomal targeting signals.

| Primer  | Sequence                                                    | Amplified fragment            |
|---------|-------------------------------------------------------------|-------------------------------|
| das-P1  | CAGTACTAACCGCAGATTTAAATATGGCTAGAATTCCAAAAGCAGTATC           | Dihydroxyacetone synthase     |
| das -P2 | TAACTAATTACATGAATTTAAATTTACAGTTTTGACAACTTGTCATGCTTTGGTTTTTC |                               |
| dak-P1  | AAACACACATCAACAGTCGACATGTCTAGTAAACATTGGGATTAC               | Dihydroxyacetone kinase       |
| dak-P2  | AGGCCATGGAGGTACGTCGACCTACAGTTTTGACAACTTGGTTTCAGATTTGAAG     |                               |
| aox-P1  | AGAATCATTCAAAGGTTTCGAAATGGCTATCCCCGAAGAGTTTG                | Alcohol oxidase               |
| aox-P2  | TAACTAATTACATGATTCGAATTAGAATCTAGCAAGACCGGTCTTC              |                               |
| cta-P1  | CTAGTGGATCCTAGTCATATGTCTGCGTTCGTTAAACCTAAGTAAC              | Catalase                      |
| cta-P2  | AGGCCATGGAGGTACGTCGACCTACAGTTTTGACAATCTTGCTGCAGAGT          |                               |
| xyr-P1  | AAACACACATCAACAGTCGACATGTCTATTACTTTGAACTCAGGT               | Xylose reductase              |
| xyr-P2  | AGGCCATGGAGGTACGTCGACTTACACAAAAGTTGGAATCTTGTC               |                               |
| xyk-P1  | CAGTACTAACCGCAGATTTAAATATGGAAGCCCTCGTAGACCAGCTC             | Xylulokinase                  |
| xyk-P2  | TAACTAATTACATGAATTTAAATCTAATCATGCTTCAAATTCTCCTC             |                               |
| x dh-P1 | GGAACCCGAAACTAAGGATCCATGTCTTGTAATTTTACTTCAAGCA              | Xylitol dehydrogenase         |
| x dh-P2 | GGCCATGGAGGTACCGGATCCTTACTCGGGACCATCTATAATAAC               |                               |
| hph-P1  | TTAAACACACATCAACAGTCGACATGCCTGAACTCACCGCGACGTCTG            | Hygromycin                    |
| hph-P2  | ACAGGCCATGGAGGTACGTCGACCTATTCCTTTGCCCTCGGACGAGTG            |                               |
| fbp-P1  | AAACACACATCAACAGTCGACATGTCCAATAACACCACCCAAAAC               | Fructose-1,6-bisphosphatase 2 |

|                  |                                                             |                                    |
|------------------|-------------------------------------------------------------|------------------------------------|
| fbp-P2           | AGGCCATGGAGGTACGTCGACCTACAGTTTTGAGAGATTCACAGATTGGA<br>TCTTA |                                    |
| fba-P1           | GTACTAACCGCAGATTTAAATATGTCTACATTTGATTTCCCTTTCCAG            | Fructose-1,6-bisphosphate aldolase |
| fba-P2           | ACTAATTACATGAATTTAAATTCA CAGTTTGA CT CAGACTTGAAG            |                                    |
| tal-P1           | AAACACACATCAACAGTCGACATGGAATCCAATCCTATCAACTC                | Transaldolase                      |
| tal-P2           | AGGCCATGGAGGTACGTCGACTTCAACTTGGATAAAAACACGAC                |                                    |
| Gnd-P1           | AACACACATCAACAGTCGACATGACTGACACTTCAAACAT                    | 6-phosphogluconate dehydrogenase   |
| Gnd-P2           | GGCCATGGAGGTACGTCGACTTAAGCATCGTAAGTGGAAG                    |                                    |
| Tpi-P1           | GAATCATTCAAAGGTTGAAATGTCTCGAACCTTTTTTGT                     | Triose phosphate isomerase         |
| Tpi-P2           | AACTAATTACATGATTCGAATTAAGTCGAGAGTTGATGA                     |                                    |
| Shm1-P1          | TACTAACCGCAGATTTAAATATGCAGCGATTCACTCGACT                    | serine hydroxymethyltransferase    |
| Shm1-P2          | CTAATTACATGAATTTAAATCCCGGCCGCTATTTGTATCCAGCAGGAT            |                                    |
| Ptp-P1           | AACACACATCAACAGTCGACATGGCCGCTCTTCACCAATT                    | phosphate transporter              |
| Ptp-P2           | TGGCCATGGAGGTACGTCGACCTAAGACAATTGGTAAACCT                   |                                    |
| Sda-P1           | AACACACATCAACAGTCGACATGGCCTCCATCATCGACGG                    | serine deaminase                   |
| Sda-P2           | GGCCATGGAGGTACGTCGACTTAGAAAAGACCCTCGATCT                    |                                    |
| Hsp70-P1         | AACACACATCAACAGTCGACATGAGTGAAGGAACTTTTGC                    | heat shock protein 70              |
| Hsp70-P2         | GGCCATGGAGGTACGTCGACTTATCGGGTAGCCATGGCCT                    |                                    |
| sgRNA-<br>pme1 F | TTACGCCAAGCTTGTTTGTTTAAACCCCCAGTTGCAAAAGTTGAC               | sgRNA-Sdh5                         |
| Sdh5-N20 R       | CAGGGTTGATGTTGGCCTGGACGTCAACCTGCGCCGACCC                    |                                    |
| Sdh5-N20 F       | CCAGGCCAACATCAACCCTGGTTTTAGAGCTAGAAATAGC                    |                                    |
| sgRNA-sal1<br>R  | GCCAACCCGGTCTCTGTGACAAAAAAAAGCACCGACTCGG                    |                                    |



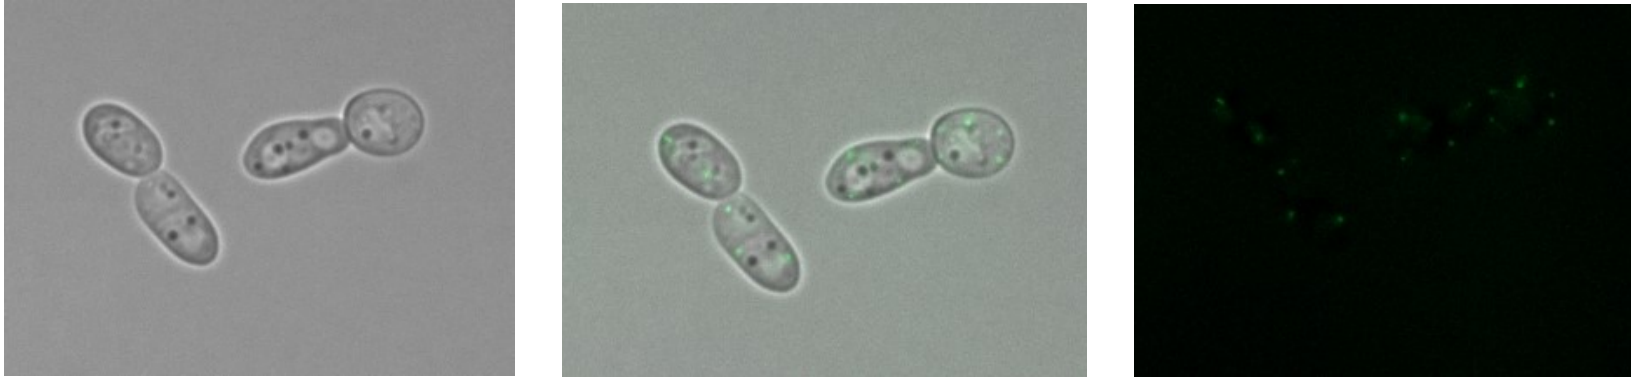

Supplemental Fig.1 Subcellular localization of the eGFP fused with peroxisomal targeting signals SKL.

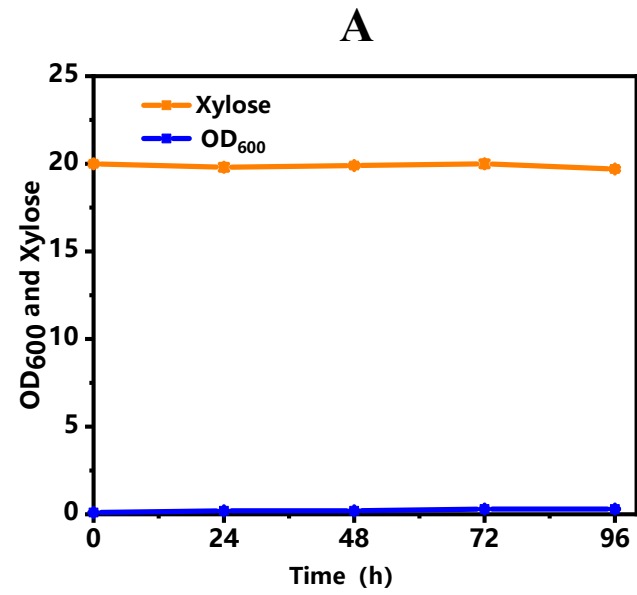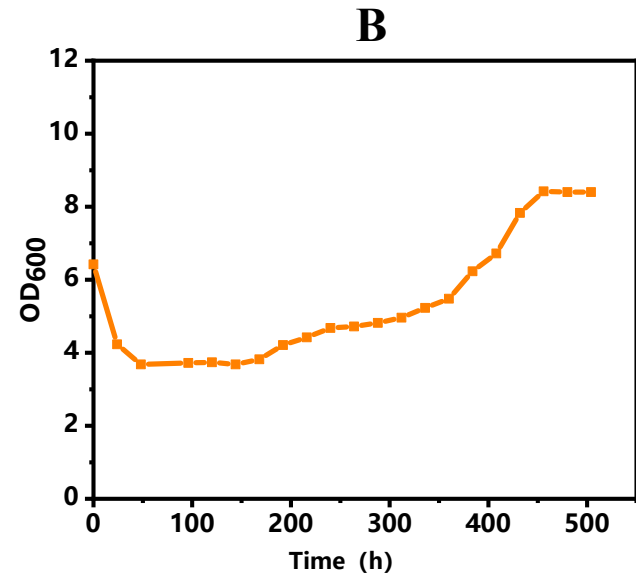

Supplemental Fig. 2 Cell growth of Y1-002 in SD medium supplemented with 20 g/L of xylose (A) and SAE (B).

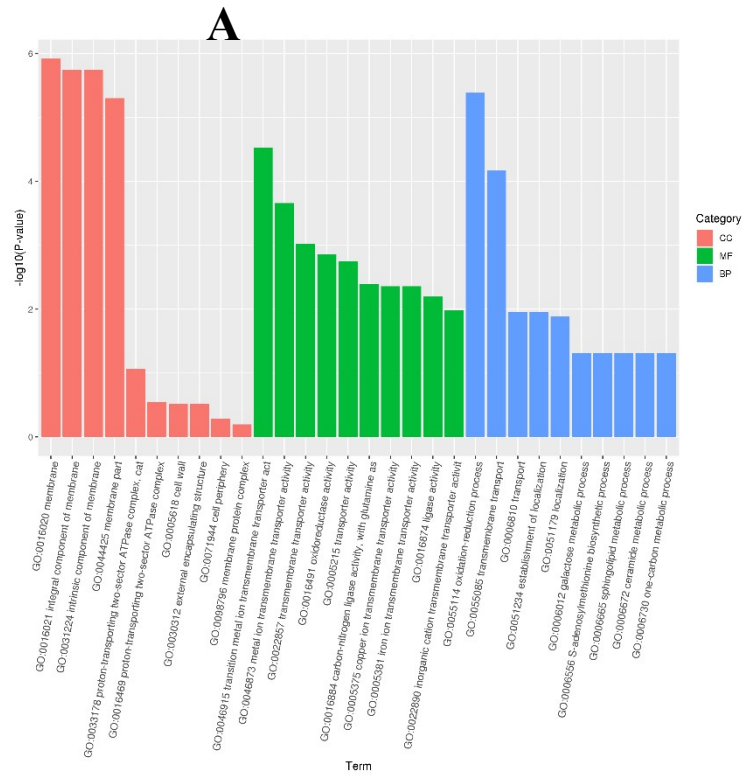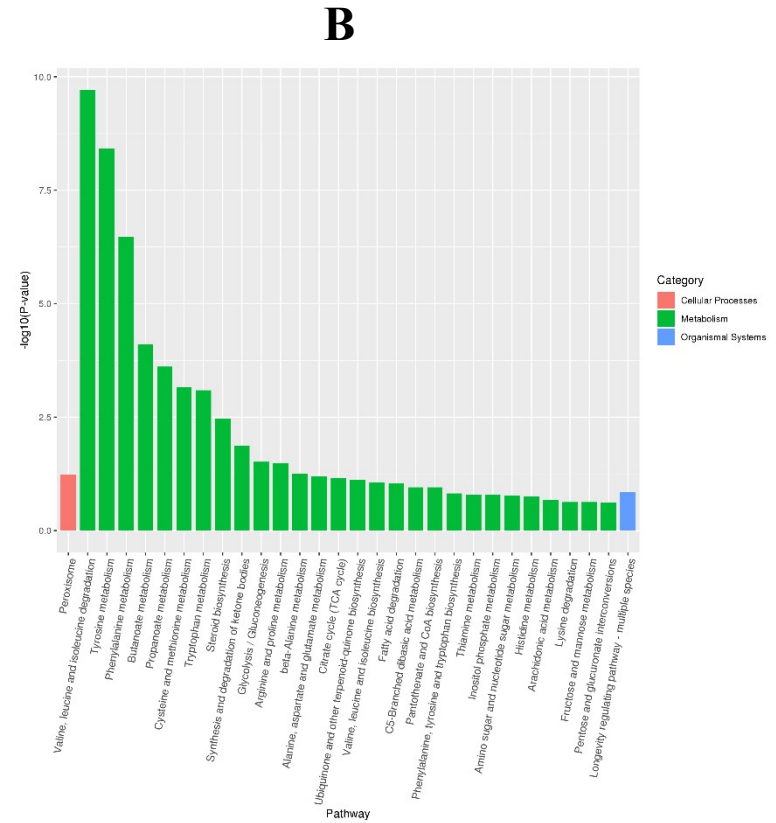

Supplemental Fig. 3 Classification of differentially expressed genes according to KEGG\_B\_class annotation (A) and GO\_Term (B).

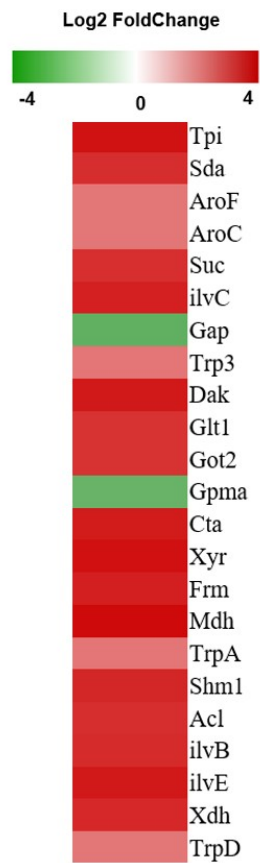

Supplemental Fig. 4 The heatmap of genes involved in methanol metabolism and showed significant expression. Upregulated and Downregulated genes are indicated with red and green.

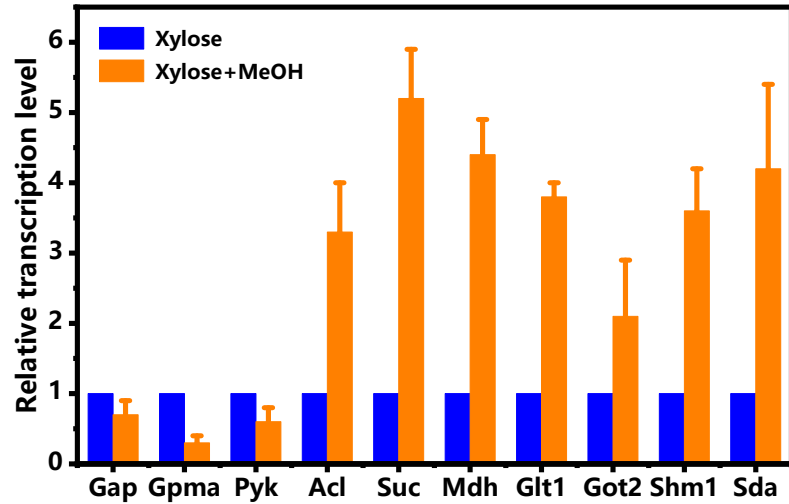

Supplemental Fig. 5 Relative transcription level of genes involved in glycolysis (*gap*, *gpma* and *pyk*), TCA cycle (*acl*, *suc* and *mdh*) and amino acids synthesis pathways (*glt1*, *got2*, *shm1* and *sda*) of strain Y1-004 grown on SD medium containing 20 g/L of xylose with or without 20 g/L of methanol.
